# Supplementary material for: Synthesis, structures and luminescence of several coordination complexes based on β-octamolybdate and Ag/Cu phosphine units
Source: Royal Society of Chemistry journal article supplement (doi:10.1039/d4ce00496e), 2024-01-01
Supplement: d4ce00496e1.pdf [file d4ce00496e1.pdf]

# Syntheses, Structures and Luminescence of Several Coordination Complexes Based on $\beta$ -octamolybdate and Ag/Cu Phosphine Units

*Yi-qi Yu,<sup>a,†</sup> Shang-Bin Sun,<sup>a,†</sup> Wen-Hao Deng,<sup>b,†</sup> Jian Li,<sup>a</sup> Zhi-Yi Lu,<sup>a</sup> Jia-Hui He,<sup>a</sup> Long-Sheng Wang,<sup>a,\*</sup> Xiang-Gao Meng,<sup>c,\*</sup>*

<sup>a</sup> School of Materials and Chemical Engineering, Hubei Provincial Key Laboratory of Green Materials for Light Industry, Hubei University of Technology, Hubei University of Technology, Hubei Wuhan, 430068, P.R. China Email: [wangls@mail.hbut.edu.cn](mailto:wangls@mail.hbut.edu.cn)

<sup>b</sup> Key Laboratory of Material Chemistry for Energy Conversion and Storage, Ministry of Education, School of Chemistry and Chemical Engineering, Huazhong University of Science and Technology, Wuhan 430074, P. R. China

<sup>c</sup> School of Chemistry, Central China Normal University, Hubei Wuhan, 430079, P.R. China  
Email: [mengxianggao@ccnu.edu.cn](mailto:mengxianggao@ccnu.edu.cn)

KEYWORDS: Polyoxometalates, Metal complexes, Luminescence, Self-assembly

Scheme S1 Synthetic formula of compounds **1** – **4**.

Table S1. Crystal data collection and structure refinement parameters for compounds **1-4**.

Table S2 Selected bond lengths of compounds **1** – **4**.

Table S3 Summary of hydrogen bonding in compounds **1-4**.

Table S4 BVS results of compound **1**.

Table S5 BVS results of compound **2**

Table S6 BVS results of compound **3**

Table S7 BVS results of compound **4**

Table S8 NBO Calculation Results of compounds **1-4**.

Table S9 Solubility of compounds **1-4** in common solvents.

Figure S1. FT-IR spectrum of compound **1**.

Figure S2. FT-IR spectrum of compound **2**

Figure S3. FT-IR spectrum of compound **3**

Figure S4. FT-IR spectrum of compound **4**

Figure S5. Diagrams of coordination sphere in compounds **1-4** and  $\beta$ -octamolybdates.

Figure S6. Diagrams of cluster skeleton of  $\beta$ -octamolybdates, compounds **1-4**

Figure S7. The distances between the planes of two adjacent  $\text{Mo}_4$  rings (light yellow) and the planes of two adjacent  $\text{Mo}_2\text{O}_2$  rings (light green) in compounds **1-4** and  $\beta$ -octamolybdates.

Figure S9. XRD spectrum of compound **1**.

Figure S10. XRD spectrum of compound **2**.

Figure S11. XRD spectrum of compound **3**.

Figure S12. XRD spectrum of compound **4**.

Figure S13. TGA and DTG of compound **1**.

Figure S14. TGA and DTG of compound **2**.

Figure S15. TGA and DTG of compound **3**.

Figure S16. TGA and DTG of compound **4**.

Figure S17. Luminescent spectra of compounds **1 (a)**, **2 (b)**, **3 (c)**, **4 (d)** in their DMF solutions.

Figure S18. Luminescent spectra of **CuTPP<sub>2</sub> (a)**, **AgTPP<sub>2</sub> (b)**, **Cu<sub>2</sub>DPPM<sub>2</sub> (c)**, **Ag<sub>2</sub>DPPM<sub>2</sub> (d)** in their DMF solutions.

Figure S19. Luminescence lifetime of compounds **1 (a)**, **2 (b)**, **3 (c)**, **4 (d)**.

Figure S20. Luminescence lifetime of **CuTPP<sub>2</sub> (a)**, **AgTPP<sub>2</sub> (b)**, **Cu<sub>2</sub>DPPM<sub>2</sub> (c)**, **Ag<sub>2</sub>DPPM<sub>2</sub> (d)**.

.

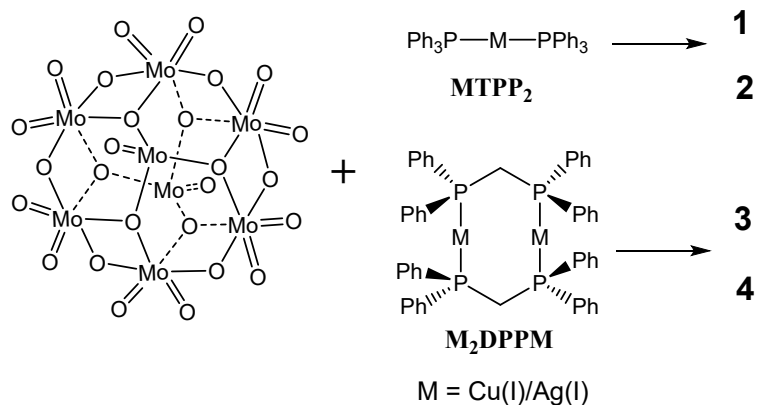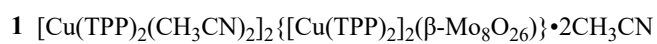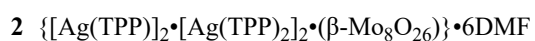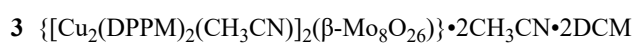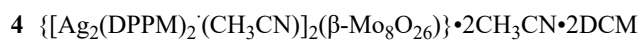

Scheme S1 Synthetic formula of compounds **1 – 4**.

Table S1. Crystal data collection and structure refinement parameters for compounds 1-4

|                                                                                       | 1                                                                                                               | 2                                                                                                               | 3                                                                                                                               | 4                                                                                                                               |
|---------------------------------------------------------------------------------------|-----------------------------------------------------------------------------------------------------------------|-----------------------------------------------------------------------------------------------------------------|---------------------------------------------------------------------------------------------------------------------------------|---------------------------------------------------------------------------------------------------------------------------------|
| Empirical formula                                                                     | C <sub>156</sub> H <sub>138</sub> N <sub>6</sub> O <sub>26</sub> P <sub>8</sub> Cu <sub>4</sub> Mo <sub>8</sub> | C <sub>126</sub> H <sub>132</sub> N <sub>6</sub> O <sub>32</sub> P <sub>6</sub> Ag <sub>4</sub> Mo <sub>8</sub> | C <sub>110</sub> H <sub>104</sub> N <sub>4</sub> O <sub>26</sub> Cu <sub>4</sub> Mo <sub>8</sub> P <sub>8</sub> Cl <sub>4</sub> | C <sub>110</sub> H <sub>104</sub> N <sub>4</sub> O <sub>26</sub> Ag <sub>4</sub> Mo <sub>8</sub> P <sub>8</sub> Cl <sub>4</sub> |
| Formula weight                                                                        | 3782.16                                                                                                         | 3627.19                                                                                                         | 3309.21                                                                                                                         | 3486.53                                                                                                                         |
| Crystal description                                                                   | red, Block                                                                                                      | yellow, Block                                                                                                   | Yellow, Block                                                                                                                   | white, Block                                                                                                                    |
| Temperature(K)                                                                        | 200.00                                                                                                          | 200.00                                                                                                          | 150(2) K                                                                                                                        | 200.00                                                                                                                          |
| Crystal system                                                                        | Triclinic                                                                                                       | Triclinic                                                                                                       | Monoclinic                                                                                                                      | orthorhombic                                                                                                                    |
| Space group                                                                           | P-1                                                                                                             | P-1                                                                                                             | P2(1)/c                                                                                                                         | Pna2 <sub>1</sub>                                                                                                               |
| <i>a</i> (Å)                                                                          | 15.9275(6)                                                                                                      | 13.0333(5)                                                                                                      | 13.265(3)                                                                                                                       | 23.7515(8)                                                                                                                      |
| <i>b</i> (Å)                                                                          | 16.1794(6)                                                                                                      | 15.0730(6)                                                                                                      | 21.934(4)                                                                                                                       | 17.9116(6)                                                                                                                      |
| <i>c</i> (Å)                                                                          | 19.0604(8)                                                                                                      | 18.2889(7)                                                                                                      | 23.266(5)                                                                                                                       | 33.5518(11)                                                                                                                     |
| $\alpha$ (°)                                                                          | 81.001(2)                                                                                                       | 106.8400(10)                                                                                                    | 90                                                                                                                              | 90                                                                                                                              |
| $\beta$ (°)                                                                           | 78.9540(10)                                                                                                     | 92.6010(10)                                                                                                     | 91.29(3)                                                                                                                        | 90                                                                                                                              |
| $\gamma$ (°)                                                                          | 88.4190(10)                                                                                                     | 97.4600(10)                                                                                                     | 90                                                                                                                              | 90                                                                                                                              |
| <i>V</i> (Å <sup>3</sup> )                                                            | 4761.5(3)                                                                                                       | 3396.6(2)                                                                                                       | 6768(2)                                                                                                                         | 14273.9(8)                                                                                                                      |
| <i>Z</i>                                                                              | 1                                                                                                               | 1                                                                                                               | 2                                                                                                                               | 4                                                                                                                               |
| $\rho_{\text{calc}}/\text{g}\cdot\text{cm}^{-3}$                                      | 1.319                                                                                                           | 1.773                                                                                                           | 1.624                                                                                                                           | 1.622                                                                                                                           |
| $2\theta$ range /deg                                                                  | 3.64 – 52.742                                                                                                   | 4.094 – 60.734                                                                                                  | 3.714 – 50.098                                                                                                                  | 6.476 – 114.65                                                                                                                  |
| $\mu$ (mm <sup>-1</sup> )                                                             | 1.068                                                                                                           | 1.419                                                                                                           | 1.565                                                                                                                           | 7.975                                                                                                                           |
| <i>F</i> (000)                                                                        | 1896.0                                                                                                          | 1800.0                                                                                                          | 3280                                                                                                                            | 6848                                                                                                                            |
| Reflections collected.                                                                | 106468                                                                                                          | 48101                                                                                                           | 37944                                                                                                                           | 136260                                                                                                                          |
| Data/restranints/Parameters                                                           | 19329/81/941                                                                                                    | 16250/282/917                                                                                                   | 11941 / 297/ 751                                                                                                                | 26085/500/1290                                                                                                                  |
| <i>R</i> <sub>1</sub> , <i>wR</i> <sub>2</sub> ( <i>I</i> > 2 $\sigma$ ( <i>I</i> ))* | <i>R</i> <sub>1</sub> = 0.0483, <i>wR</i> <sub>2</sub> = 0.1467                                                 | <i>R</i> <sub>1</sub> = 0.0425, <i>wR</i> <sub>2</sub> = 0.1161                                                 | <i>R</i> <sub>1</sub> = 0.0789, <i>wR</i> <sub>2</sub> = 0.1871                                                                 | <i>R</i> <sub>1</sub> = 0.0539, <i>wR</i> <sub>2</sub> = 0.1373                                                                 |
| <i>R</i> <sub>1</sub> , <i>wR</i> <sub>2</sub> (all data)**                           | <i>R</i> <sub>1</sub> = 0.0665, <i>wR</i> <sub>2</sub> = 0.1563                                                 | <i>R</i> <sub>1</sub> = 0.0494, <i>wR</i> <sub>2</sub> = 0.1200                                                 | <i>R</i> <sub>1</sub> = 0.0960, <i>wR</i> <sub>2</sub> = 0.1954                                                                 | <i>R</i> <sub>1</sub> = 0.0574, <i>wR</i> <sub>2</sub> = 0.1396                                                                 |
| GOF ( <i>F</i> <sup>2</sup> )                                                         | 1.122                                                                                                           | 1.048                                                                                                           | 1.115                                                                                                                           | 1.054                                                                                                                           |
| Largest diff. peak/hole / e Å <sup>-3</sup> .                                         | 0.76/-1.11                                                                                                      | 1.73/-1.29                                                                                                      | 1.61/-1.54                                                                                                                      | 1.60/-0.96                                                                                                                      |
| CCDC NO.                                                                              | 2355794                                                                                                         | 2355793                                                                                                         | 2355795                                                                                                                         | 2355796                                                                                                                         |

\**R*<sub>1</sub> =  $\sum||F_o| - |F_c||/\sum|F_o|$  and *Rw*<sup>b</sup> =  $[\sum[w(F_o^2 - F_c^2)^2]/\sum w(F_o^2)^2]^{1/2}$

Table S2 Selected bond lengths of compounds **1** – **4**.

|                   | <b>1</b> | <b>2</b>   | <b>3</b> | <b>4</b>  | <b><math>\beta</math>-Mo<sub>8</sub>O<sub>26</sub></b> |
|-------------------|----------|------------|----------|-----------|--------------------------------------------------------|
| Mo-O <sub>t</sub> | 1.693(3) | 1.6844(15) | 1.686(7) | 1.664(7)  | 1.690(2)                                               |
|                   | 1.695(3) | 1.7019(13) | 1.692(7) | 1.676(9)  | 1.695(2)                                               |
|                   | 1.702(3) | 1.7030(14) | 1.698(7) | 1.688(10) | 1.698(2)                                               |
|                   | 1.704(4) | 1.7090(11) | 1.701(7) | 1.692(8)  | 1.700(2)                                               |
|                   | 1.709(3) | 1.7108(12) | 1.709(8) | 1.694(8)  | 1.706(2)                                               |
|                   | 1.728(3) | 1.7167(13) | 1.724(7) | 1.696(8)  | 1.709(2)                                               |
|                   | 1.730(3) | 1.7199(13) | 1.739(6) | 1.707(8)  | 1.713(2)                                               |
|                   |          |            |          | 1.717(8)  |                                                        |
|                   |          |            |          | 1.720(8)  |                                                        |
|                   |          |            |          | 1.728(8)  |                                                        |
|                   |          |            |          | 1.730(9)  |                                                        |
|                   |          |            |          | 1.738(7)  |                                                        |
|                   |          |            |          | 1.741(8)  |                                                        |
|                   |          |            |          | 1.743(10) |                                                        |
|                   |          |            |          |           |                                                        |
| Mo-O <sub>b</sub> | 1.737(3) | 1.7461(13) | 1.745(7) | 1.746(9)  | 1.745(2)                                               |
|                   | 1.880(3) | 1.8746(12) | 1.854(6) | 1.811(8)  | 1.881(2)                                               |
|                   | 1.880(3) | 1.8949(13) | 1.875(6) | 1.889(8)  | 1.893(2)                                               |
|                   | 1.916(3) | 1.9175(12) | 1.945(6) | 1.889(8)  | 1.931(2)                                               |
|                   | 1.921(3) | 1.9355(10) | 1.966(6) | 1.905(8)  | 1.933(2)                                               |
|                   | 2.267(3) | 2.2771(13) | 2.262(6) | 1.909(8)  | 2.296(2)                                               |
|                   |          |            |          | 1.915(8)  |                                                        |
|                   |          |            |          | 1.916(8)  |                                                        |
|                   |          |            |          | 1.920(7)  |                                                        |
|                   |          |            |          | 1.940(7)  |                                                        |
|                   |          |            |          | 2.265(9)  |                                                        |
|                   |          |            |          | 2.267(8)  |                                                        |
|                   |          |            |          |           |                                                        |
| Mo- $\mu_3$ -O    | 1.932(3) | 1.9350(10) | 1.937(6) | 1.935(7)  | 1.944(2)                                               |
|                   | 1.935(3) | 1.9482(10) | 1.939(6) | 1.945(7)  | 1.951(2)                                               |
|                   | 1.985(3) | 2.0116(12) | 2.009(6) | 1.953(7)  | 1.982(2)                                               |
|                   | 1.992(3) | 2.0145(12) | 2.010(6) | 1.960(7)  | 1.998(2)                                               |
|                   | 2.357(3) | 2.2736(12) | 2.323(6) | 1.961(7)  | 2.331(2)                                               |
|                   | 2.373(3) | 2.3003(12) | 2.352(6) | 1.974(7)  | 2.343(2)                                               |
|                   |          |            |          | 2.006(8)  |                                                        |
|                   |          |            |          | 2.024(7)  |                                                        |
|                   |          |            |          | 2.322(7)  |                                                        |
|                   |          |            |          | 2.346(7)  |                                                        |
|                   |          |            |          | 2.362(7)  |                                                        |
|                   |          |            |          | 2.375(7)  |                                                        |

|                |            |            |          |           |          |
|----------------|------------|------------|----------|-----------|----------|
| Mo- $\mu_5$ -O | 2.146(3)   | 2.1720(11) | 2.183(6) | 2.150(7)  | 2.150(1) |
|                | 2.256(3)   | 2.2683(9)  | 2.256(6) | 2.158(8)  | 2.309(2) |
|                | 2.262(3)   | 2.3045(10) | 2.306(6) | 2.255(7)  | 2.325(1) |
|                | 2.457(3)   | 2.3387(12) | 2.401(6) | 2.278(7)  | 2.382(2) |
|                | 2.560      | 2.5059(11) | 2.474(6) | 2.310(8)  | 2.463(2) |
|                |            |            |          | 2.322(8)  |          |
|                |            |            |          | 2.397(8)  |          |
|                |            |            |          | 2.425(7)  |          |
|                |            |            |          | 2.492(8)  |          |
|                |            |            |          | 2.536     |          |
| Cu-O           | 2.078(3)   |            | 2.094(6) |           |          |
|                | 2.081(3)   |            | 2.137(7) |           |          |
| Cu-P           | 2.2415(14) |            | 2.232(3) |           |          |
|                | 2.2447(13) |            | 2.241(3) |           |          |
|                | 2.2735(14) |            | 2.254(3) |           |          |
|                | 2.2782(14) |            | 2.245(3) |           |          |
| Cu-N           | 2.032(5)   |            | 1.98(1)  |           |          |
|                | 2.048(4)   |            |          |           |          |
| Ag-O           |            | 2.3713(11) |          | 2.366(8)  |          |
|                |            | 2.3806(13) |          | 2.439(8)  |          |
|                |            | 2.3884(13) |          | 2.491(7)  |          |
|                |            | 2.5002(12) |          | 2.506(8)  |          |
| Ag-N           |            |            |          | 2.437(12) |          |
|                |            |            |          | 2.459(12) |          |
| Ag-P           |            | 2.3613(5)  |          | 2.417(3)  |          |
|                |            | 2.4164(5)  |          | 2.423(3)  |          |
|                |            | 2.4365(5)  |          | 2.434(3)  |          |
|                |            |            |          | 2.433(3)  |          |
|                |            |            |          | 2.442(3)  |          |
|                |            |            |          | 2.442(3)  |          |
|                |            |            |          | 2.464(3)  |          |
|                |            |            |          | 2.467(3)  |          |

The bond lengths of  $\beta$ - $\text{Mo}_8\text{O}_{26}$  were obtained from the Ref “Polyhedron 18 (1999) 3371–3375”

Table S3 Summary of hydrogen bonding in compounds 1-4.

| Compound 1                                                                                                               |          |            |            |          |
|--------------------------------------------------------------------------------------------------------------------------|----------|------------|------------|----------|
| D-H...A                                                                                                                  | d(D-H) Å | d(H...A) Å | d(D...A) Å | <(DHA) ° |
| C116-H116...O12                                                                                                          | 0.95     | 2.54       | 3.2110(1)  | 128      |
| C124-H124...O9 <sup>#1</sup>                                                                                             | 0.95     | 2.55       | 3.1452(1)  | 122      |
| C132-H132...O6                                                                                                           | 0.95     | 2.51       | 3.4025(1)  | 157      |
| C232-H232...O10                                                                                                          | 0.95     | 2.36       | 3.2195(1)  | 150      |
| C335-H335...O8                                                                                                           | 0.95     | 2.38       | 3.1792(1)  | 141      |
| C232-H232...O10 <sup>#1</sup>                                                                                            | 0.95     | 2.36       | 3.2801(1)  | 162      |
| Symmetry code: <sup>#1</sup> : 1-x, -y, 1-z;                                                                             |          |            |            |          |
| Compound 2                                                                                                               |          |            |            |          |
| C115-H115...O8 <sup>#1</sup>                                                                                             | 0.95     | 2.50       | 3.3353(1)  | 146      |
| C124-H124...O12 <sup>#2</sup>                                                                                            | 0.95     | 2.41       | 3.4568(1)  | 160      |
| C222-H222...O8                                                                                                           | 0.95     | 2.57       | 3.3618(1)  | 141      |
| Symmetry code: <sup>#1</sup> : 1-x, 1-y, 1-z; <sup>#2</sup> : -1+x, y, z                                                 |          |            |            |          |
| Compound 3                                                                                                               |          |            |            |          |
| C4-H4A...O8                                                                                                              | 0.98     | 2.52       | 3.4685(8)  | 163      |
| C32-H32...O9                                                                                                             | 0.95     | 2.41       | 3.2831(7)  | 144      |
| C32-H32...O6 <sup>#1</sup>                                                                                               | 0.95     | 2.58       | 3.3889(8)  | 143      |
| C35-H35...O3 <sup>#2</sup>                                                                                               | 0.95     | 2.55       | 3.3351(8)  | 140      |
| C76-H76...O10 <sup>#1</sup>                                                                                              | 0.95     | 2.29       | 3.1299(7)  | 147      |
| C82-H82...O7 <sup>#3</sup>                                                                                               | 0.95     | 2.58       | 3.2449(7)  | 127      |
| C76-H76...O10 <sup>#3</sup>                                                                                              | 0.95     | 2.52       | 3.2698(7)  | 136      |
| Symmetry code: <sup>#1</sup> : -x, -y, 2-z; <sup>#2</sup> : 1-x, -y, 2-z; <sup>#3</sup> : -x, 1/2+y, 3/2-z;              |          |            |            |          |
| Compound 4                                                                                                               |          |            |            |          |
| C3-H3B...O3 <sup>#1</sup>                                                                                                | 0.99     | 2.40       | 3.3203(1)  | 155      |
| C116-H116...O19 <sup>#2</sup>                                                                                            | 0.95     | 2.48       | 3.0974(1)  | 123      |
| C213-H213...O2 <sup>#2</sup>                                                                                             | 0.95     | 2.38       | 3.2471(1)  | 151      |
| C512-H512...O3 <sup>#3</sup>                                                                                             | 0.95     | 2.44       | 3.3634(1)  | 163      |
| C513-H513...O15 <sup>#3</sup>                                                                                            | 0.95     | 2.44       | 3.1964(1)  | 136      |
| Symmetry code: <sup>#1</sup> : 1/2-x, -1/2+y, -1/2+z; <sup>#2</sup> : 1/2+x, 3/2-y, z; <sup>#3</sup> : -1/2+x, 1/2-y, z; |          |            |            |          |

Table S4 BVS results of compound **1**.

| Compound <b>1</b>        | [Cu(TPP) <sub>2</sub> (CH <sub>3</sub> CN) <sub>2</sub> ] <sub>2</sub> {[Cu(TPP) <sub>2</sub> ] <sub>2</sub> (β-Mo <sub>8</sub> O <sub>26</sub> )}·2CH <sub>3</sub> CN |      |      |      |             |      |      |
|--------------------------|------------------------------------------------------------------------------------------------------------------------------------------------------------------------|------|------|------|-------------|------|------|
|                          | Mo1                                                                                                                                                                    | Mo2  | Mo3  | Mo4  |             | Cu1  | Cu2  |
| <b>O(1)</b>              | 1.61                                                                                                                                                                   |      |      |      | <b>P(1)</b> | 0.48 |      |
| <b>O(2)</b>              | 1.80                                                                                                                                                                   |      |      |      | <b>P(2)</b> | 0.48 |      |
| <b>O(3)</b>              |                                                                                                                                                                        | 1.73 |      |      | <b>P(3)</b> |      | 0.44 |
| <b>O(4)</b>              |                                                                                                                                                                        | 1.71 |      |      | <b>P(4)</b> |      | 0.43 |
| <b>O(5)</b>              |                                                                                                                                                                        |      | 1.74 |      | <b>N(1)</b> |      | 0.32 |
| <b>O(6)</b>              |                                                                                                                                                                        |      | 1.62 |      | <b>N(2)</b> |      | 0.31 |
| <b>O(7)</b>              |                                                                                                                                                                        |      |      | 1.77 | <b>O(1)</b> | 0.27 |      |
| <b>O(8)</b>              |                                                                                                                                                                        | 0.38 |      | 1.58 | <b>O(6)</b> | 0.27 |      |
| <b>O(9)</b>              | 1.08                                                                                                                                                                   | 0.96 |      |      |             |      |      |
| <b>O(10)</b>             | 0.79                                                                                                                                                                   |      | 0.30 | 0.93 |             |      |      |
| <b>O(11)</b>             |                                                                                                                                                                        | 0.98 | 1.08 |      |             |      |      |
| <b>O(12)</b>             | 0.28                                                                                                                                                                   |      | 0.81 | 0.93 |             |      |      |
| <b>O(13)</b>             | 0.39                                                                                                                                                                   | 0.17 | 0.38 | 0.52 |             |      |      |
| <b>O(13)<sup>1</sup></b> |                                                                                                                                                                        |      |      | 0.23 |             |      |      |
| $\Sigma s$               | 5.95                                                                                                                                                                   | 5.93 | 5.75 | 5.96 |             | 1.50 | 1.50 |



Table S5 BVS results of compound **2**

| Compound <b>2</b>        | {[Ag(TPP)] <sub>2</sub> ·[Ag(TPP) <sub>2</sub> ] <sub>2</sub> ·(β-Mo <sub>8</sub> O <sub>26</sub> )}·6DMF |      |      |      |             |      |
|--------------------------|-----------------------------------------------------------------------------------------------------------|------|------|------|-------------|------|
|                          | Mo1                                                                                                       | Mo2  | Mo3  | Mo4  | Ag1         | Ag2  |
| <b>O(1)</b>              | 1.67                                                                                                      |      |      |      | <b>P(1)</b> | 0.68 |
| <b>O(2)</b>              | 1.83                                                                                                      |      |      |      | <b>P(2)</b> | 0.56 |
| <b>O(3)</b>              |                                                                                                           | 1.66 |      |      | <b>P(3)</b> | 0.59 |
| <b>O(4)</b>              |                                                                                                           | 1.71 |      |      | <b>O(1)</b> | 0.21 |
| <b>O(5)</b>              |                                                                                                           |      | 1.74 | 0.31 | <b>O(3)</b> | 0.22 |
| <b>O(6)</b>              | 0.37                                                                                                      |      | 1.54 |      | <b>O(4)</b> | 0.15 |
| <b>O(7)</b>              |                                                                                                           |      |      | 1.74 | <b>O(5)</b> | 0.08 |
| <b>O(8)</b>              |                                                                                                           |      |      | 1.70 | <b>O(7)</b> | 0.11 |
| <b>O(9)</b>              | 0.93                                                                                                      | 1.09 |      |      | <b>O(8)</b> | 0.21 |
| <b>O(10)</b>             |                                                                                                           | 0.75 | 0.93 |      |             |      |
| <b>O(11)</b>             |                                                                                                           | 0.37 | 0.89 | 0.75 |             |      |
| <b>O(12)</b>             | 0.97                                                                                                      |      |      | 1.03 |             |      |
| <b>O(13)</b>             | 0.20                                                                                                      | 0.34 | 0.49 | 0.38 |             |      |
| <b>O(13)<sup>1</sup></b> |                                                                                                           |      | 0.31 |      |             |      |
| $\Sigma s$               | 5.97                                                                                                      | 5.92 | 5.90 | 5.91 | 1.30        | 1.51 |

Table S6 BVS results of compound **3**

| Compound <b>3</b> | {[Cu <sub>2</sub> (DPPM) <sub>2</sub> (CH <sub>3</sub> CN)] <sub>2</sub> [β-Mo <sub>8</sub> O <sub>26</sub> ]}·2CH <sub>3</sub> CN·2DCM |      |      |      |             |      |      |
|-------------------|-----------------------------------------------------------------------------------------------------------------------------------------|------|------|------|-------------|------|------|
|                   | Mo1                                                                                                                                     | Mo2  | Mo3  | Mo4  |             | Cu1  | Cu2  |
| <b>O(1)</b>       | 1.59                                                                                                                                    |      |      |      | <b>P(1)</b> | 0.48 |      |
| <b>O(2)</b>       | 1.83                                                                                                                                    |      |      |      | <b>P(2)</b> |      | 0.47 |
| <b>O(3)</b>       |                                                                                                                                         | 1.80 |      |      | <b>P(3)</b> | 0.49 |      |
| <b>O(4)</b>       |                                                                                                                                         | 1.55 |      |      | <b>P(4)</b> |      | 0.48 |
| <b>O(5)</b>       |                                                                                                                                         |      | 1.75 | 0.38 | <b>O(1)</b> |      | 0.26 |
| <b>O(6)</b>       |                                                                                                                                         |      | 1.65 |      | <b>O(6)</b> |      | 0.23 |
| <b>O(7)</b>       |                                                                                                                                         |      |      | 1.74 | <b>N(1)</b> | 0.37 |      |
| <b>O(8)</b>       |                                                                                                                                         |      |      | 1.72 |             |      |      |
| <b>O(9)</b>       | 0.74                                                                                                                                    | 0.92 | 0.30 |      |             |      |      |
| <b>O(10)</b>      | 0.41                                                                                                                                    | 0.92 | 0.76 |      |             |      |      |
| <b>O(11)</b>      | 1.16                                                                                                                                    |      | 1.09 | 0.91 |             |      |      |
| <b>O(12)</b>      |                                                                                                                                         | 0.26 |      | 0.84 |             |      |      |
| <b>O(13)</b>      | 0.35                                                                                                                                    | 0.46 | 0.38 | 0.22 |             |      |      |
| Σs                | 6.01                                                                                                                                    | 5.92 | 5.93 | 5.81 |             | 1.34 | 1.44 |

Table S7 BVS results of compound 4

| Compound 4   | $\{[\text{Ag}_2(\text{DPPM})_2 \cdot (\text{CH}_3\text{CN})]_2(\beta\text{-Mo}_8\text{O}_{26})\} \cdot 2\text{CH}_3\text{CN} \cdot 2\text{DCM}$ |      |      |      |      |      |      |      |
|--------------|-------------------------------------------------------------------------------------------------------------------------------------------------|------|------|------|------|------|------|------|
|              | Mo1                                                                                                                                             | Mo2  | Mo3  | Mo4  | Mo5  | Mo6  | Mo7  | Mo8  |
| <b>O(1)</b>  | 1.63                                                                                                                                            |      |      |      |      |      |      |      |
| <b>O(2)</b>  | 1.78                                                                                                                                            |      |      |      |      |      |      |      |
| <b>O(3)</b>  |                                                                                                                                                 | 1.74 |      |      |      |      |      |      |
| <b>O(4)</b>  |                                                                                                                                                 | 1.77 |      |      |      |      |      |      |
| <b>O(5)</b>  |                                                                                                                                                 |      | 1.86 |      |      |      |      |      |
| <b>O(6)</b>  |                                                                                                                                                 |      | 1.79 |      |      |      |      |      |
| <b>O(7)</b>  |                                                                                                                                                 |      | 0.38 | 1.56 |      |      |      |      |
| <b>O(8)</b>  |                                                                                                                                                 |      |      | 1.92 |      |      |      |      |
| <b>O(9)</b>  |                                                                                                                                                 |      |      |      | 1.28 | 0.38 |      |      |
| <b>O(10)</b> |                                                                                                                                                 |      |      |      | 1.66 |      |      |      |
| <b>O(11)</b> |                                                                                                                                                 |      |      |      |      | 1.61 |      |      |
| <b>O(12)</b> |                                                                                                                                                 |      |      |      |      | 1.56 |      |      |
| <b>O(13)</b> |                                                                                                                                                 |      |      |      |      |      | 1.57 |      |
| <b>O(14)</b> |                                                                                                                                                 |      |      |      |      |      | 1.77 |      |
| <b>O(15)</b> |                                                                                                                                                 |      |      |      |      |      |      | 1.67 |
| <b>O(16)</b> |                                                                                                                                                 |      |      |      |      |      |      | 1.57 |
| <b>O(17)</b> | 1.05                                                                                                                                            |      | 1.00 |      |      |      |      |      |
| <b>O(18)</b> |                                                                                                                                                 | 0.97 |      |      |      | 0.99 |      |      |
| <b>O(19)</b> |                                                                                                                                                 |      | 0.96 |      |      |      | 1.05 |      |
| <b>O(20)</b> |                                                                                                                                                 |      |      |      |      | 0.91 |      | 1.01 |
| <b>O(21)</b> | 0.30                                                                                                                                            | 0.85 |      | 0.89 |      |      |      |      |
| <b>O(22)</b> | 0.77                                                                                                                                            | 0.29 |      |      | 0.93 |      |      |      |
| <b>O(23)</b> |                                                                                                                                                 |      |      | 0.88 |      |      | 0.29 | 0.86 |
| <b>O(24)</b> |                                                                                                                                                 |      |      |      | 0.86 |      | 0.73 | 0.33 |
| <b>O(25)</b> | 0.39                                                                                                                                            |      | 0.18 | 0.25 | 0.52 |      | 0.37 |      |
| <b>O(26)</b> |                                                                                                                                                 | 0.34 |      | 0.51 | 0.26 | 0.21 |      | 0.36 |
| $\Sigma s$   | 5.92                                                                                                                                            | 5.96 | 6.17 | 6.01 | 5.51 | 5.66 | 5.78 | 5.80 |
|              | Ag1                                                                                                                                             | Ag2  | Ag3  | Ag4  |      |      |      |      |
| <b>P(1)</b>  | 0.55                                                                                                                                            |      |      |      |      |      |      |      |

|              |      |      |      |      |
|--------------|------|------|------|------|
| <b>P(2)</b>  |      | 0.55 |      |      |
| <b>p(3)</b>  | 0.57 |      |      |      |
| <b>P(4)</b>  |      | 0.57 |      |      |
| <b>P(5)</b>  |      |      | 0.56 |      |
| <b>P(6)</b>  |      |      |      | 0.58 |
| <b>P(7)</b>  |      |      | 0.52 |      |
| <b>P(8)</b>  |      |      |      | 0.51 |
| <b>O(1)</b>  | 0.18 |      |      |      |
| <b>O(4)</b>  |      | 0.22 |      |      |
| <b>O(13)</b> |      |      | 0.22 |      |
| <b>O(16)</b> |      |      |      | 0.16 |
| <b>N(1)</b>  | 0.20 |      |      |      |
| <b>N(2)</b>  |      |      |      | 0.18 |
| <b>Σs</b>    | 1.50 | 1.34 | 1.30 | 1.43 |

---

Table S8 NBO Calculation Results of compounds 1-4.

|          | Mo        | Cu1  | Cu2  | Ag1  | Ag2  | Ag3  | Ag4  |
|----------|-----------|------|------|------|------|------|------|
| <b>1</b> | 1.26~1.42 | 0.45 |      | -    | -    | -    | -    |
| <b>2</b> | 1.39~1.49 | -    | -    | 0.58 | 0.52 | -    | -    |
| <b>3</b> | 1.17~1.44 | 0.33 | 0.55 | -    | -    | -    | -    |
| <b>4</b> | 1.31~1.36 | -    | -    | 0.39 | 0.49 | 0.48 | 0.41 |

### Computational Details

To perform natural population analysis for the obtained compounds, quantum chemical calculations were carried out using density functional theory with the hybrid functional B3LYP-D3 as implemented in the Gaussian 16 program. Here, the empirical formula DFT-D3 was used for dispersion corrections. All geometry optimizations were carried out with the 6-31G(d,p) basis sets for the H, C, N, O and P elements, and the LanL2DZ pseudopotential and its corresponding basis sets for all metal atoms, including Mo, Cu and Ag.

Table S9 Solubility of compounds **1-4** in common solvents.

|                    | <b>1</b>   | <b>2</b>   | <b>3</b>   | <b>4</b>   |
|--------------------|------------|------------|------------|------------|
| DCM                | <0.01mg/ml | <0.01mg/ml | <0.01mg/ml | <0.01mg/ml |
| CH <sub>3</sub> CN | <0.01mg/ml | <0.01mg/ml | <0.01mg/ml | <0.01mg/ml |
| CH <sub>3</sub> OH | <0.01mg/ml | <0.01mg/ml | <0.01mg/ml | <0.01mg/ml |
| H <sub>2</sub> O   | <0.01mg/ml | <0.01mg/ml | <0.01mg/ml | <0.01mg/ml |
| DMF                | 0.28mg/ml  | 0.43mg/ml  | <0.01mg/ml | <0.01mg/ml |

The gravimetric method was used to measure solubility (Table **S9**). Firstly, the excess compound and solvent were mixed in a round-bottomed flask and stirred for more than 5h using a magnetic stirrer at room temperature. After stopping stirring for a period of time, about 10mL of the upper clarified solution was filtered with a filter with 0.22 $\mu$ m pores and transferred into a preweighed vial to obtain a saturated solution. The total weight was then immediately measured by the balance and then put it in the vacuum oven to evaporate the solvent. The round-bottomed flask was reweighed after complete drying. Each experiment was performed three times, and the arithmetic mean was used as the final result.

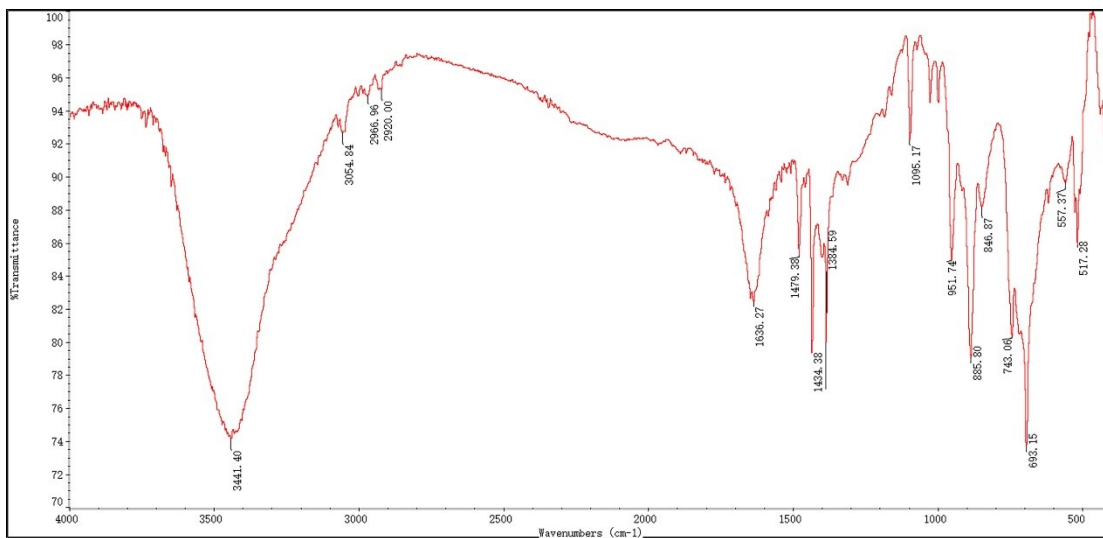

Figure S1. FT-IR spectrum of compound 1

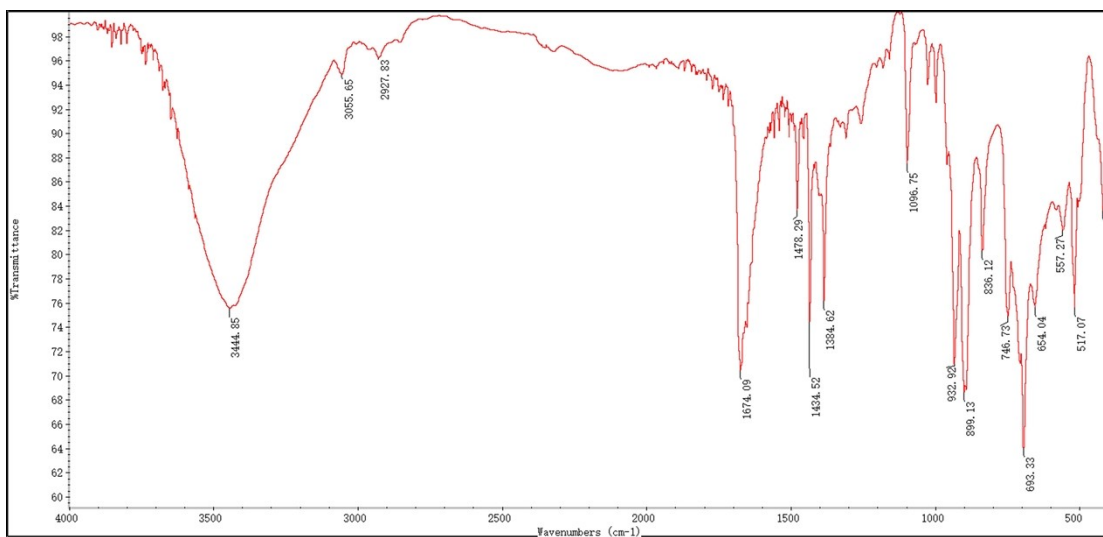

Figure S2. FT-IR spectrum of compound 2

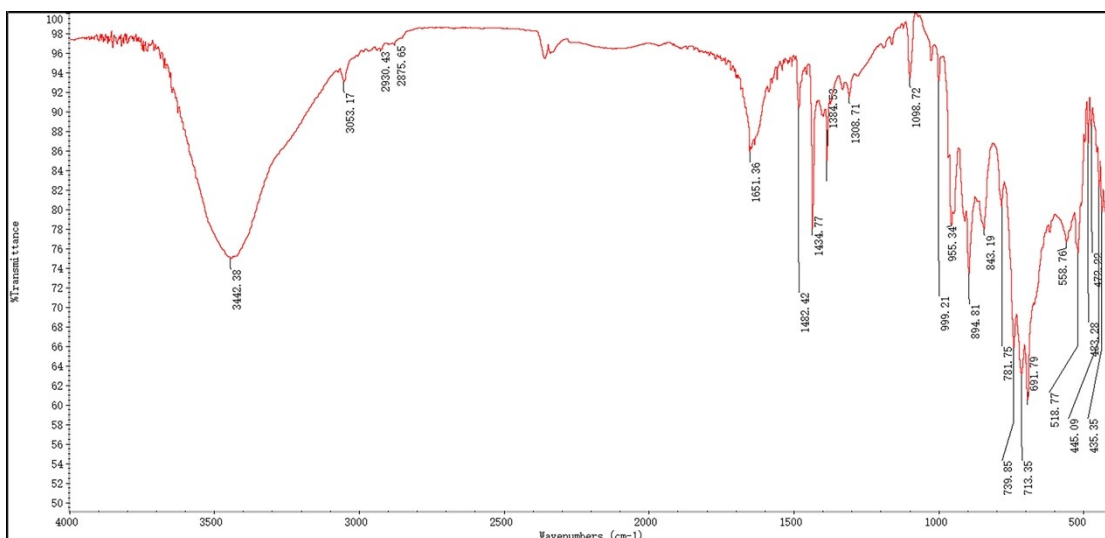

Figure S3. FT-IR spectrum of compound 3

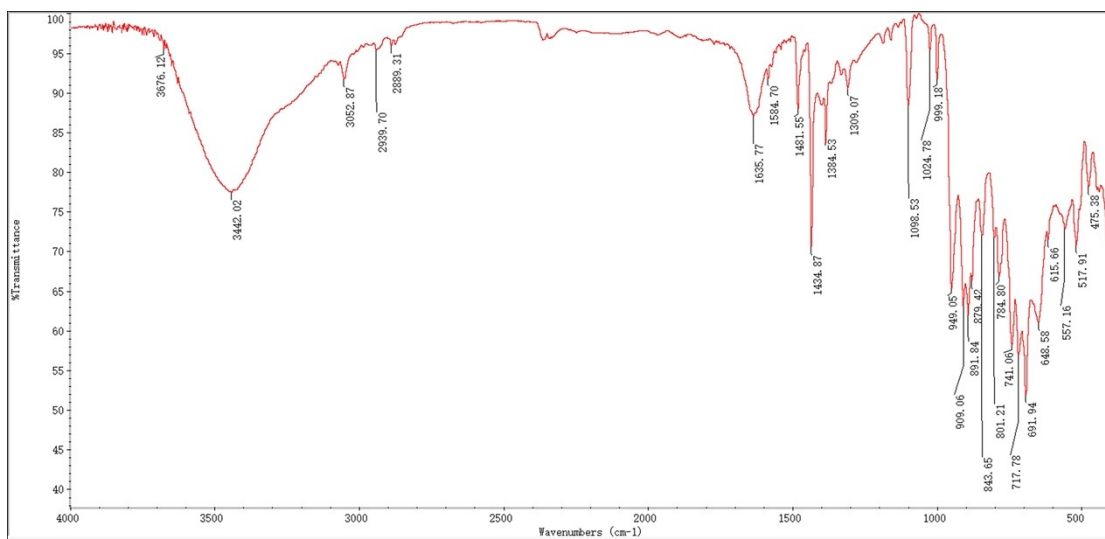

Figure S4. FT-IR spectrum of compound 4



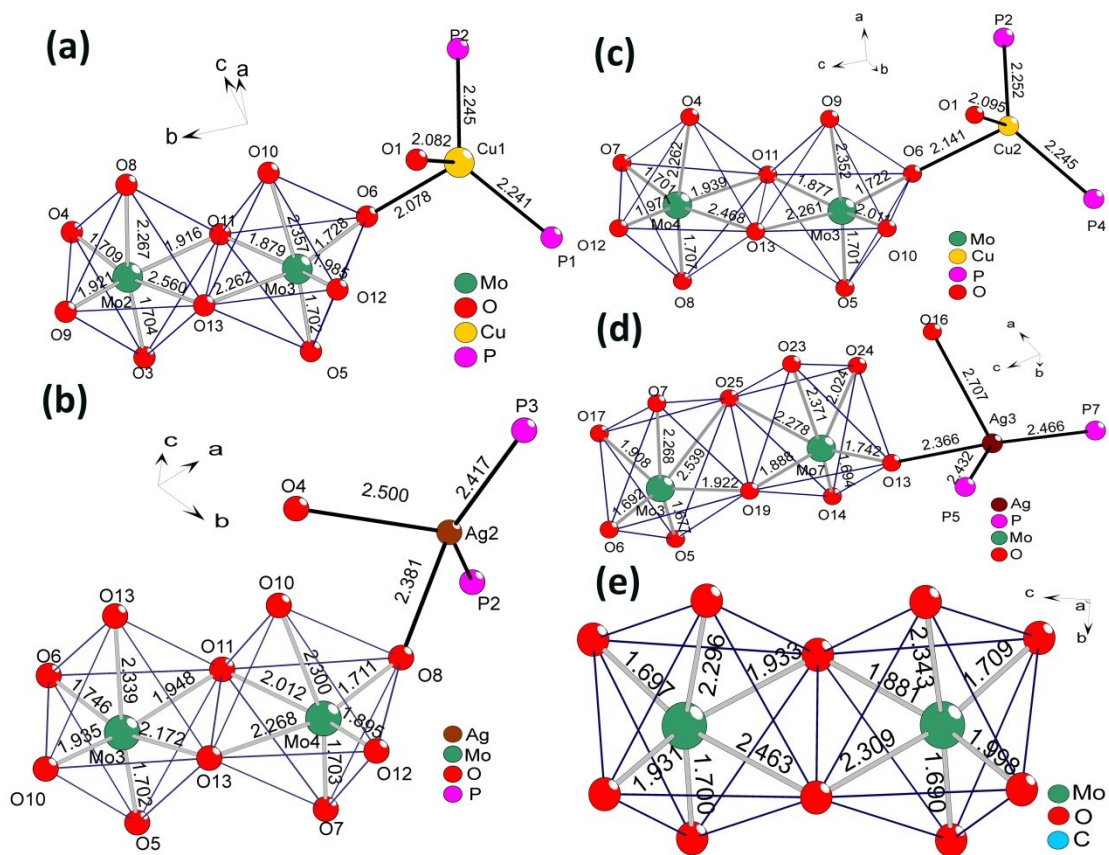

Figure S5. Diagrams of coordination sphere in compounds **1** (a), **2** (b), **3** (c), **4** (d) and  $\beta$ -octamolybdates (e).

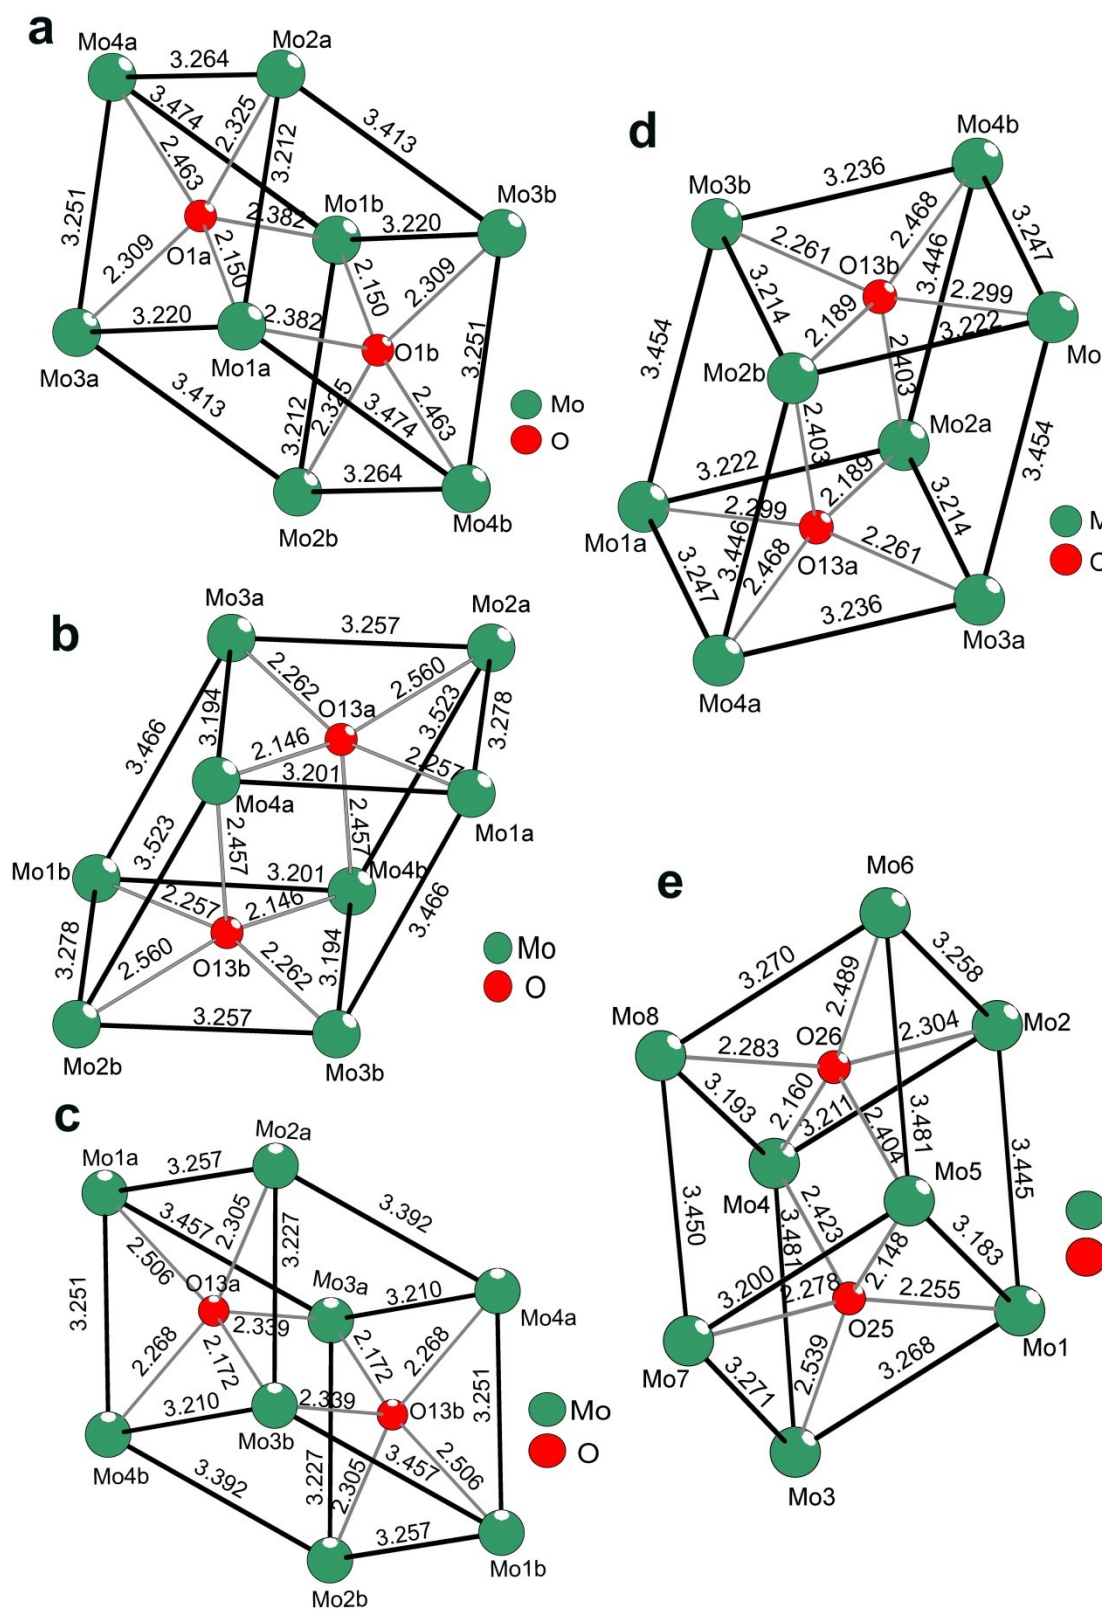

Figure S6. Diagrams of cluster skeleton of  $\beta$ -octamolybdates (a), compounds **1** (b), **2** (c), **3** (d) and **4** (e).

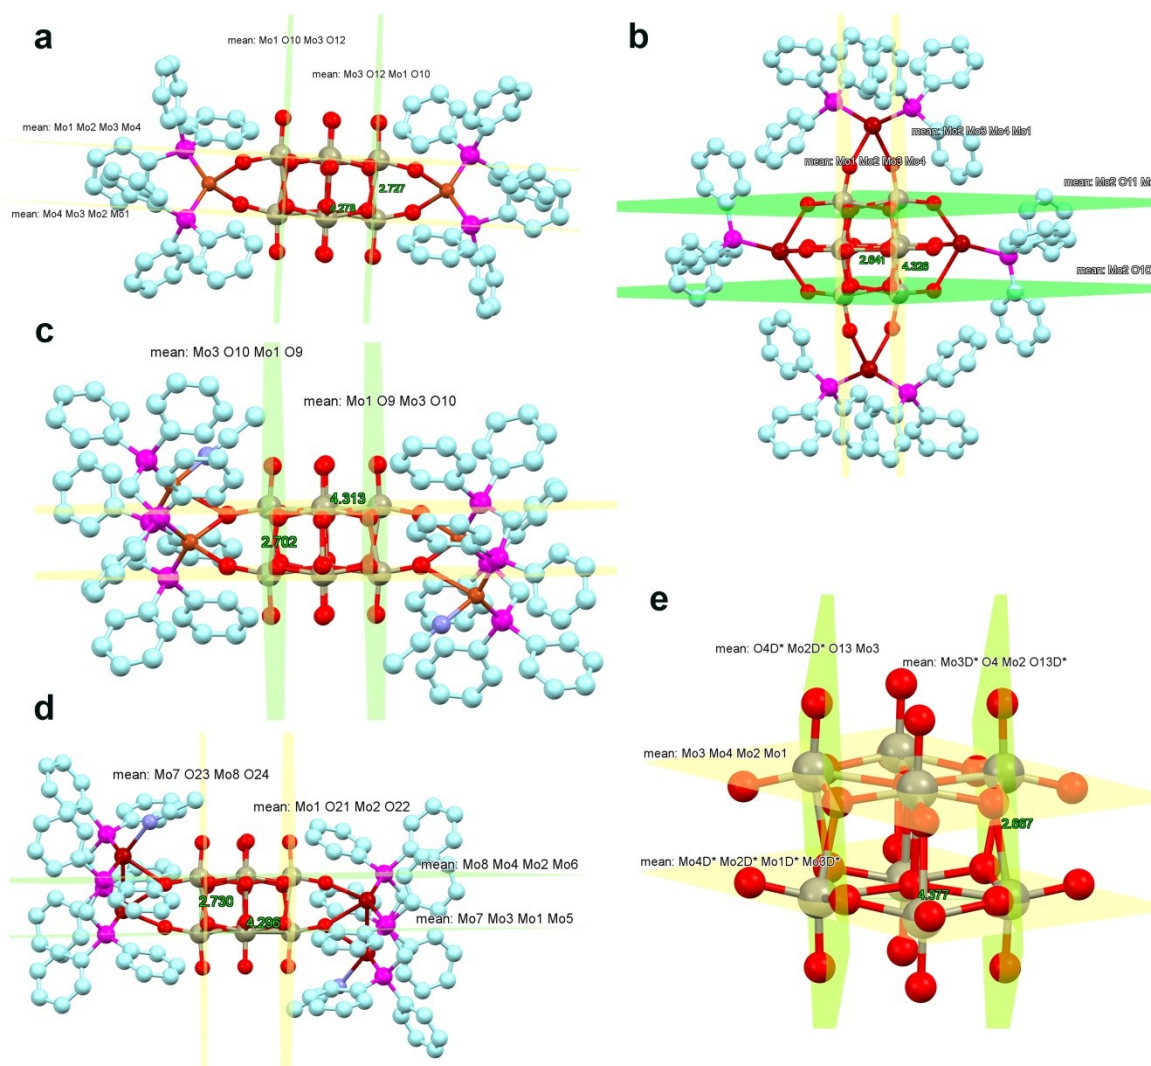

Figure S7. The distances between the planes of two adjacent Mo<sub>4</sub> rings (light yellow) and the planes of two adjacent Mo<sub>2</sub>O<sub>2</sub> rings (light green) in compounds **1** (a), **2** (b), **3** (c) and **4** (d) and  $\beta$ -octamolybdates (e).

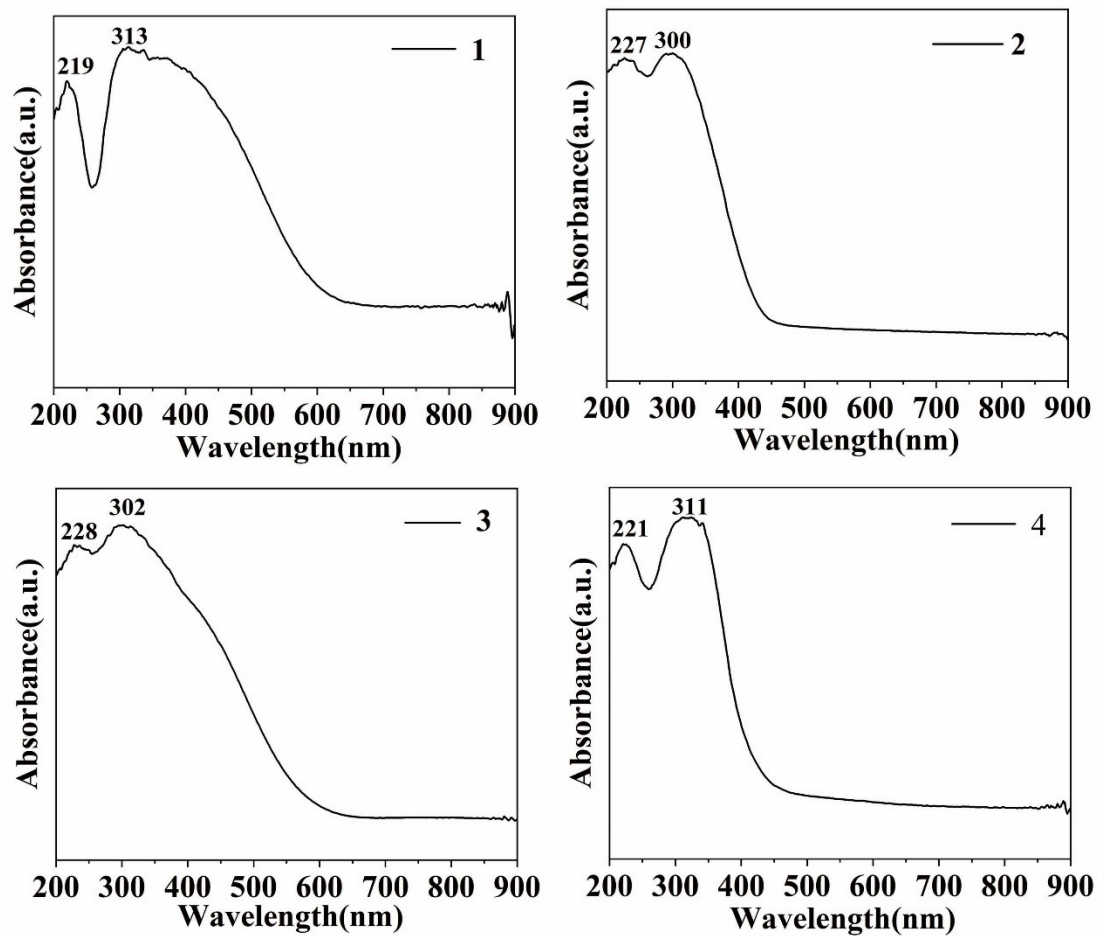

Figure S8. Solid UV/Vis absorption spectra of compounds 1-4.

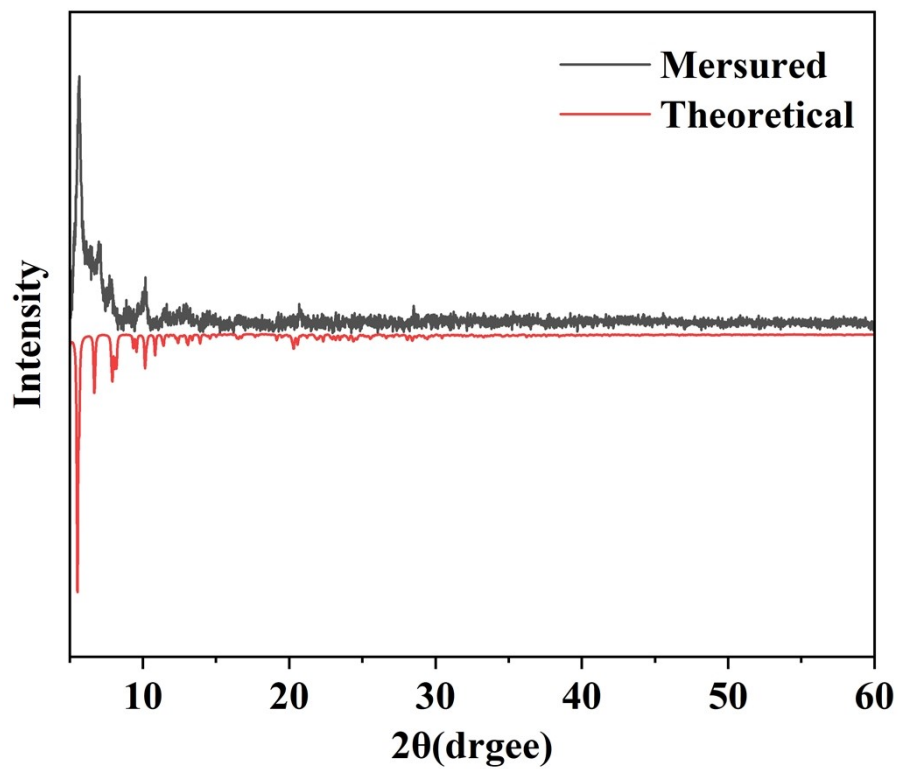

Figure S9. XRD spectrum of compound 1.

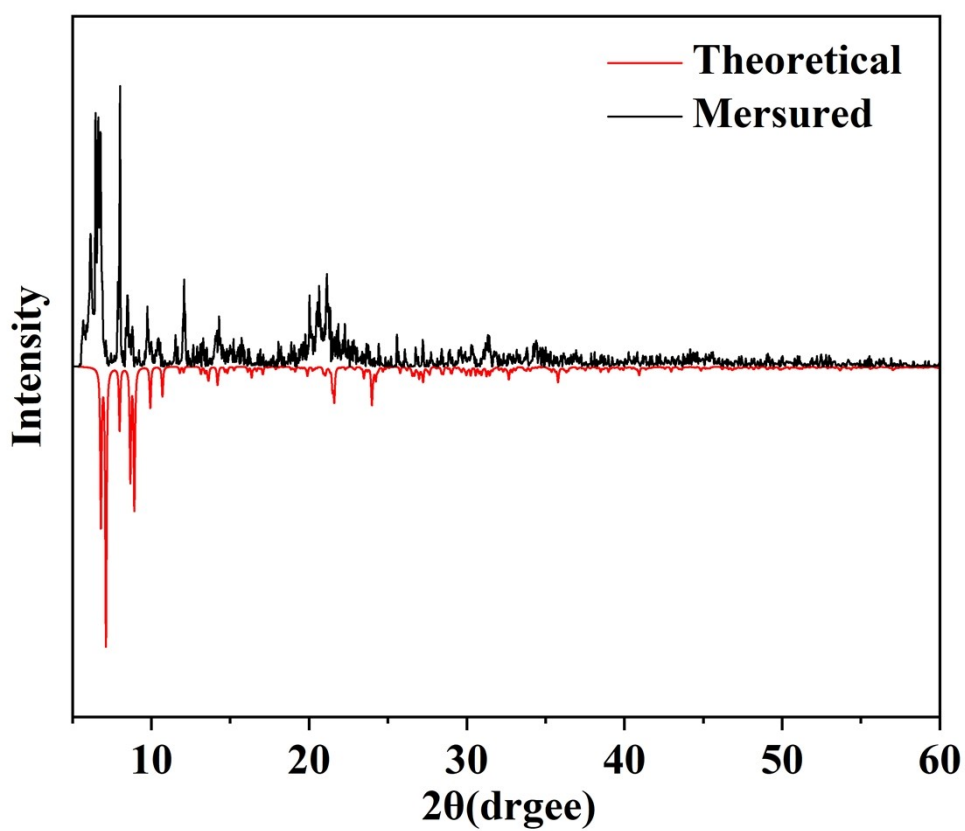

Figure S10. XRD spectrum of compound 2.

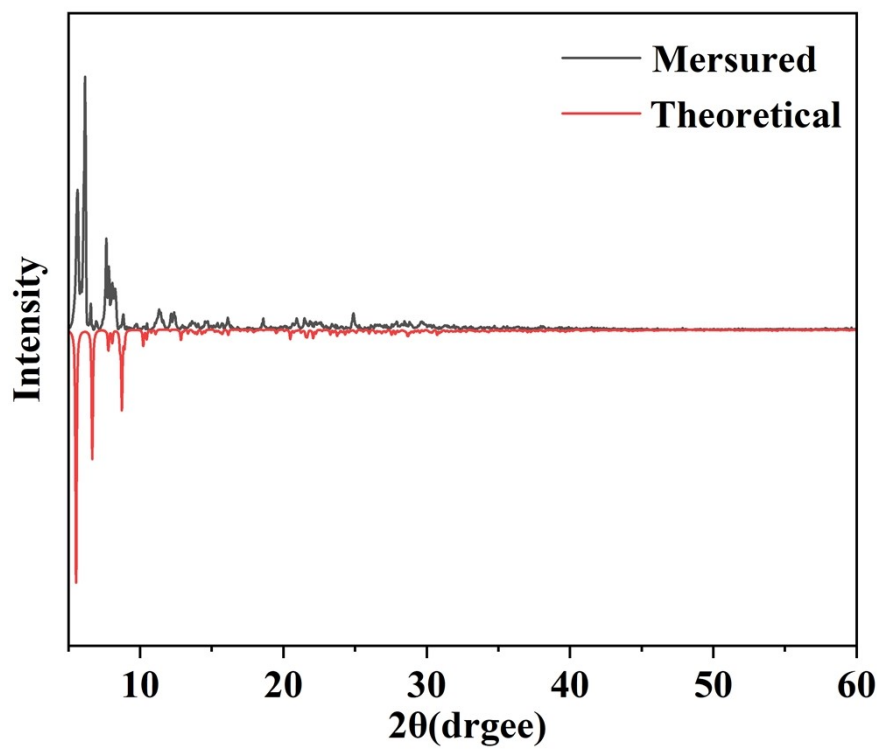

Figure S11. XRD spectrum of compound 3

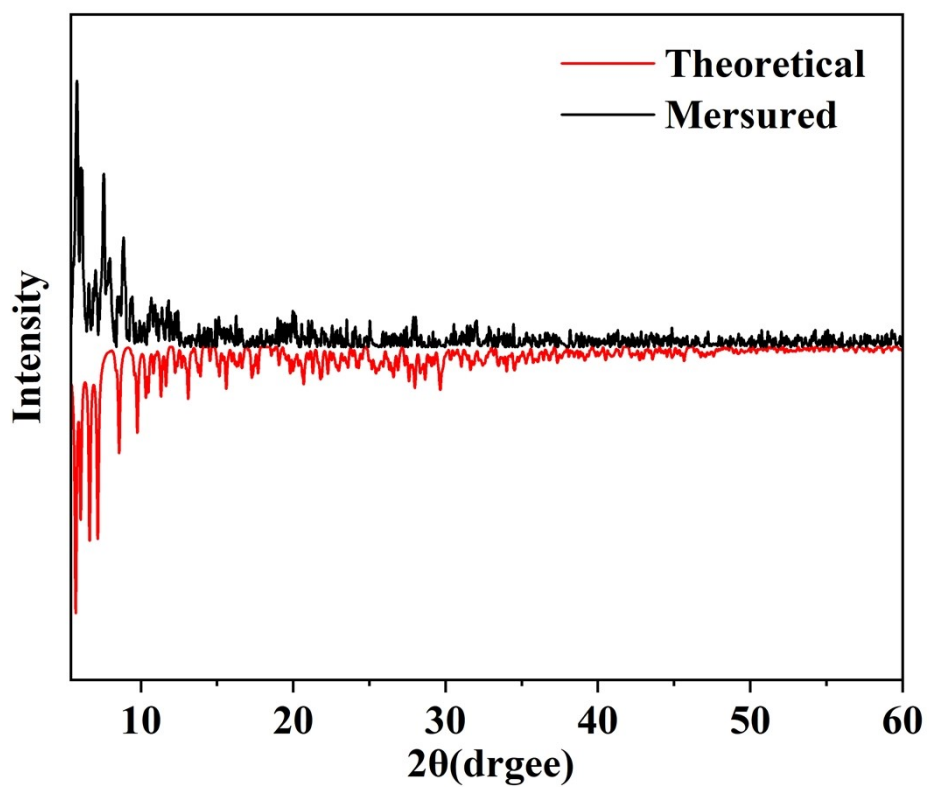

Figure S12. XRD spectrum of compound 4

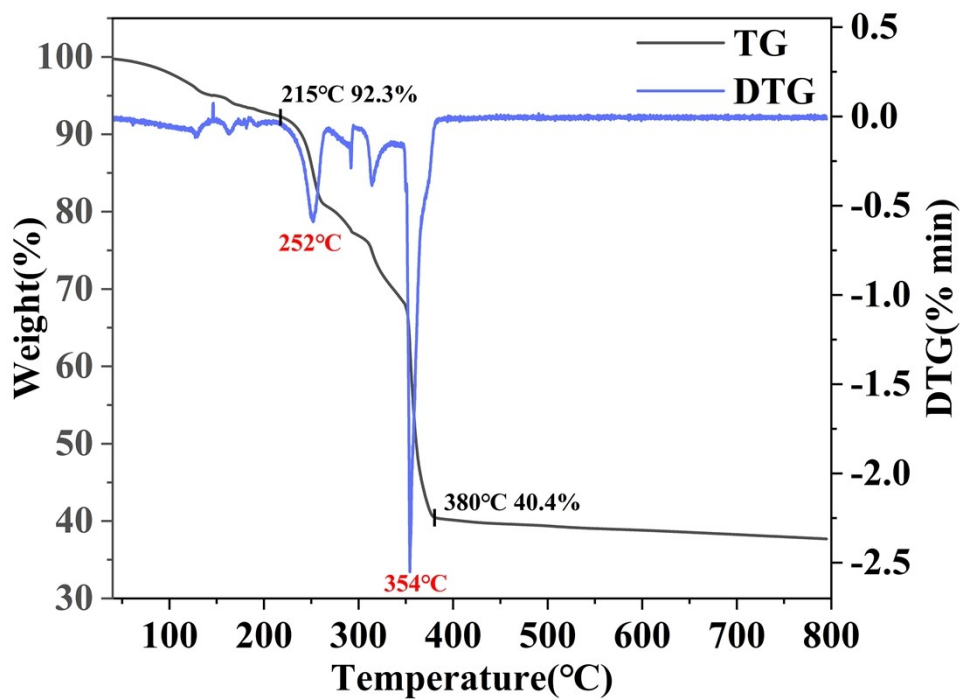

Figure S13. TGA and DTG of compound 1.

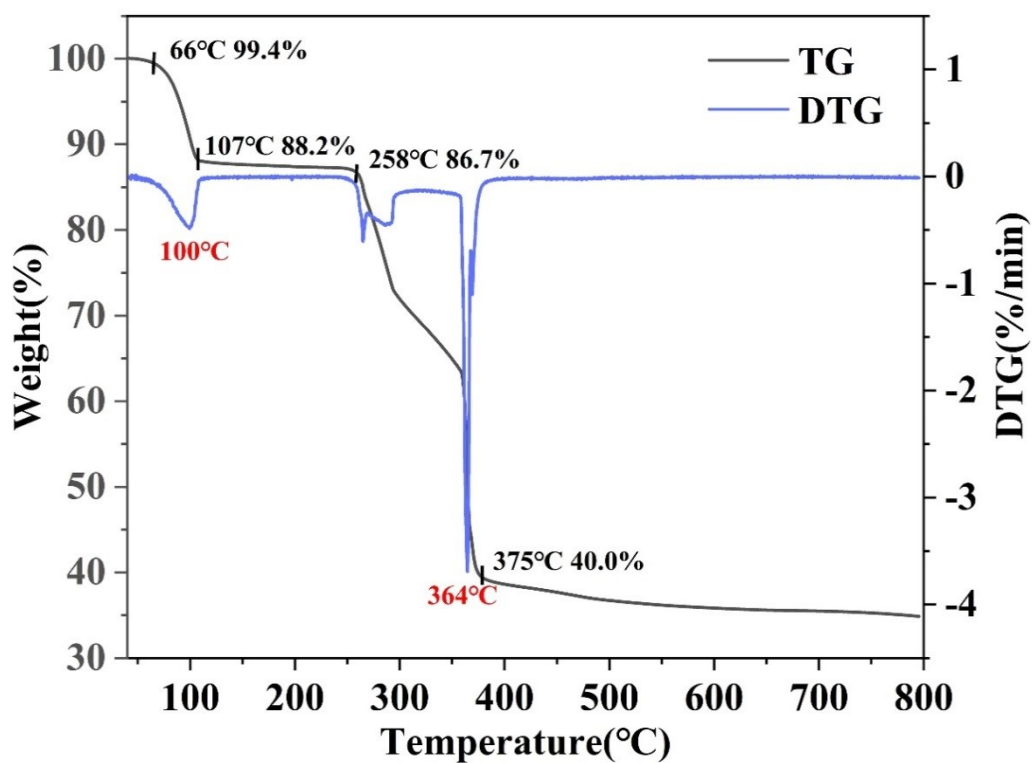

Figure S14. TGA and DTG of compound 2.

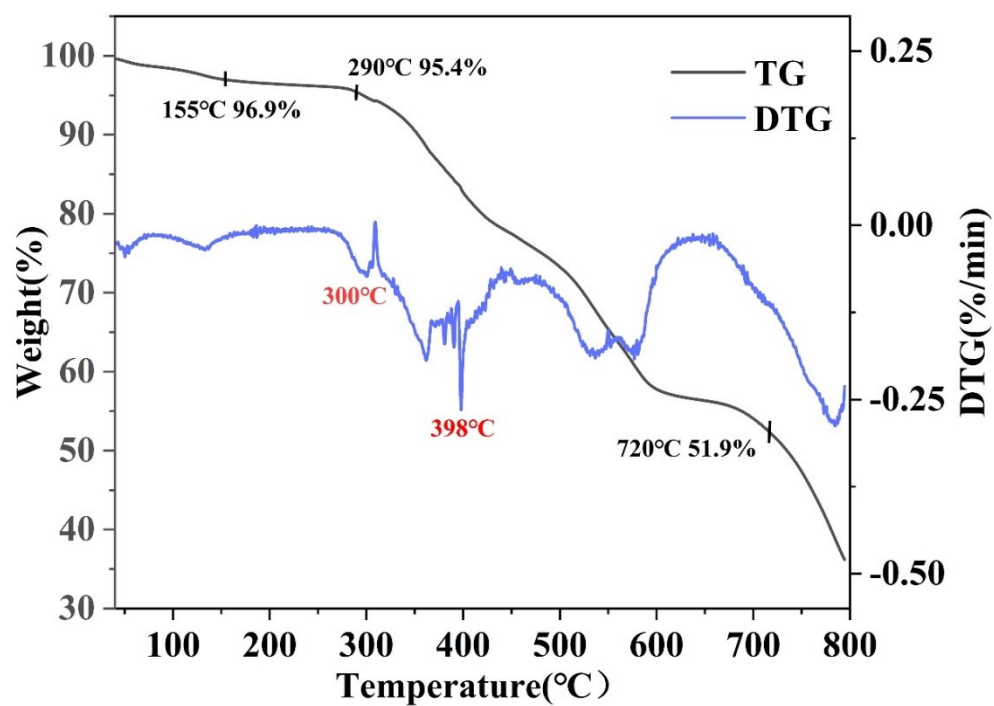

Figure S15. TGA and DTG of compound 3.

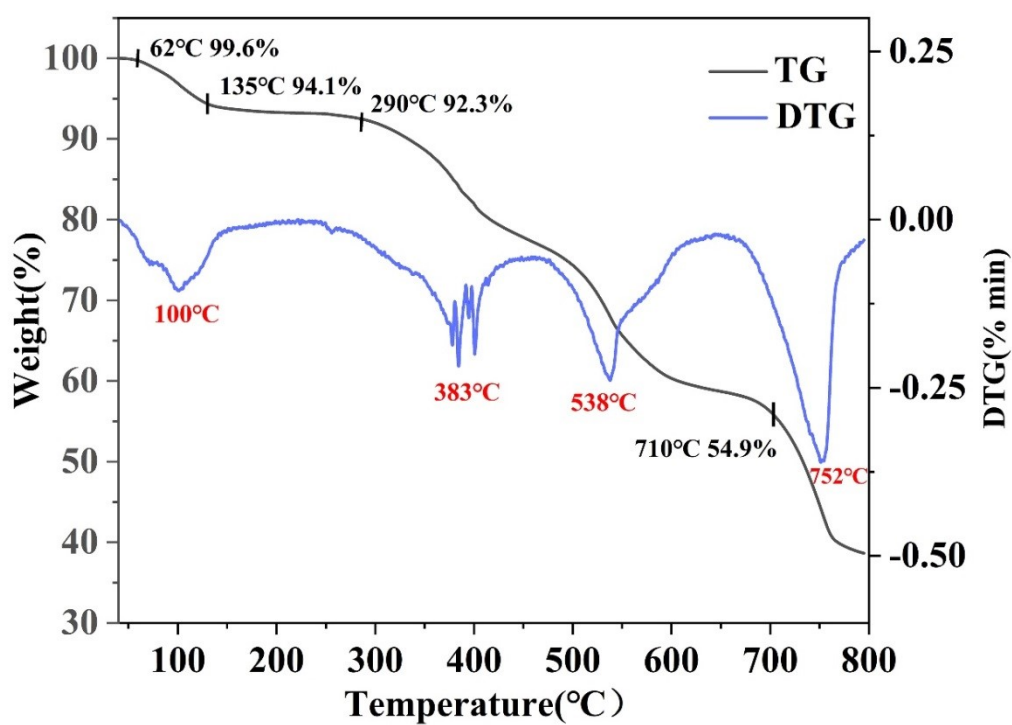

Figure S16. TGA and DTG of compound 4.



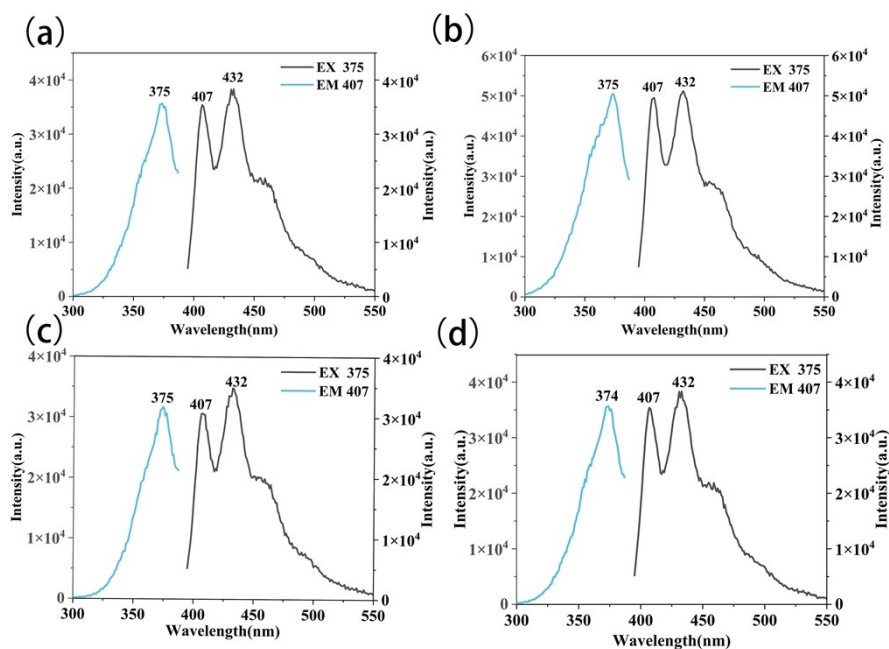

Figure S17. Luminescent spectra of compounds **1** (a), **2** (b), **3** (c), **4** (d) in their DMF solutions.

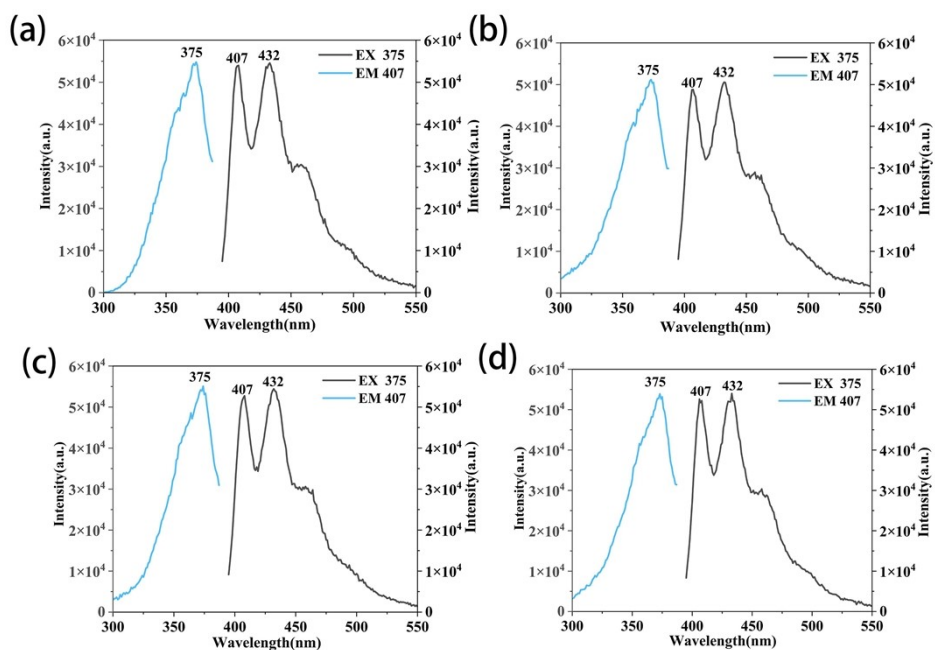

Figure S18. Luminescent spectra of **CuTPP<sub>2</sub>** (a), **AgTPP<sub>2</sub>** (b), **Cu<sub>2</sub>DPPM<sub>2</sub>** (c), **Ag<sub>2</sub>DPPM<sub>2</sub>** (d) in their DMF solutions.

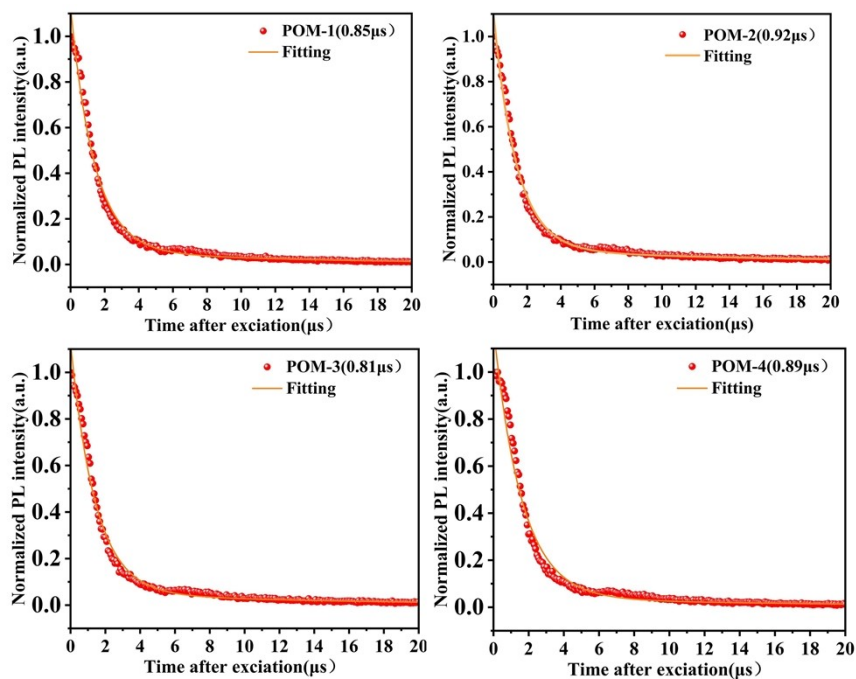

Figure S19. Luminescence lifetime of compounds **1(a)**, **2(b)**, **3(c)**, **4(d)**.

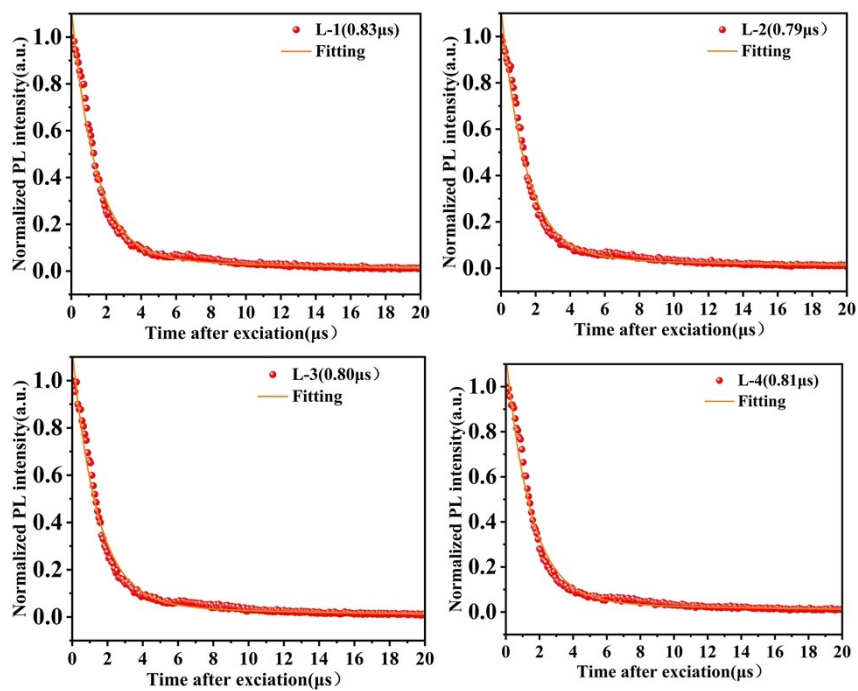

Figure S20. Luminescence lifetime of **CuTPP<sub>2</sub> (a)**, **AgTPP<sub>2</sub> (b)**, **Cu<sub>2</sub>DPPM<sub>2</sub> (c)**, **Ag<sub>2</sub>DPPM<sub>2</sub> (d)**.
